# Supplementary material for: Loss of the RNA-binding protein TACO1 causes late-onset mitochondrial dysfunction in mice
Source: PubMed Central journal article supplement (PMC4915168; doi:10.1038/ncomms11884), 2016-06-20
Supplement: ncomms11884-s1.pdf [file ncomms11884-s1.pdf]

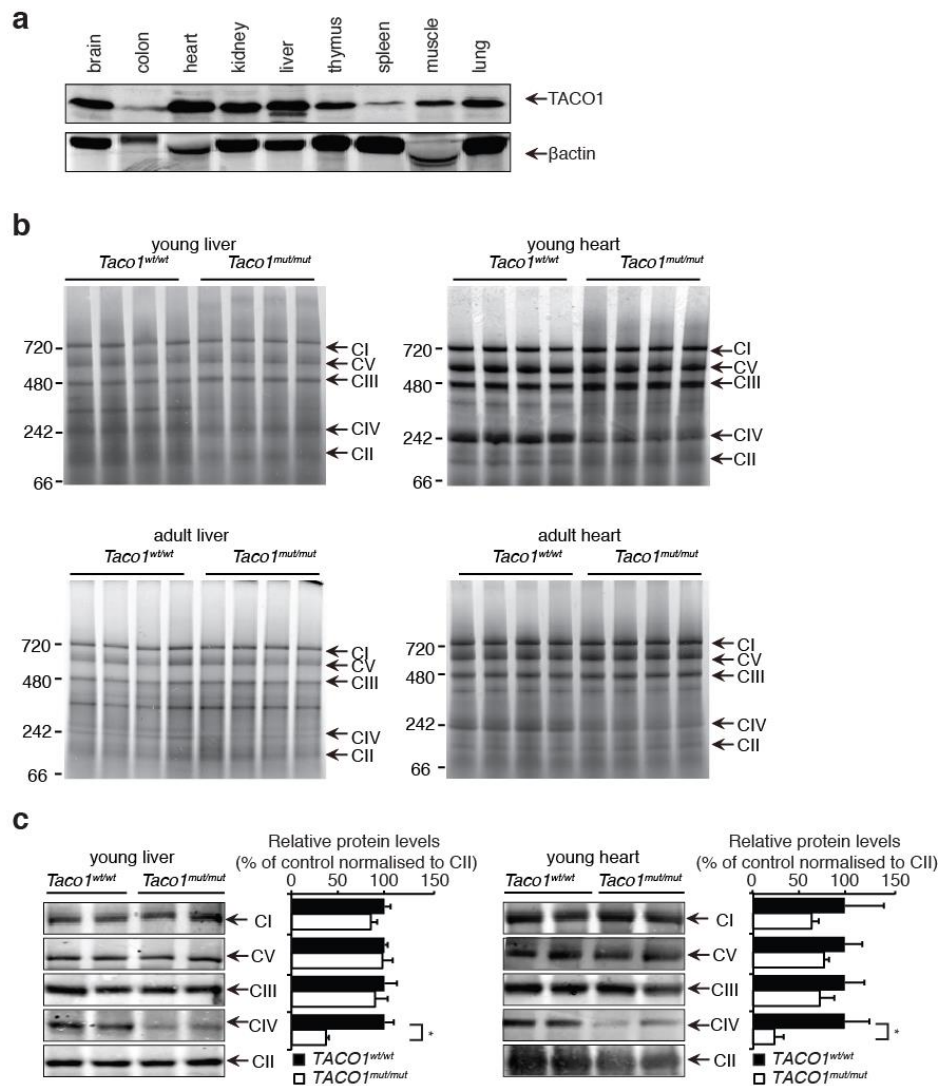

**Supplementary Figure 1. Related to Figure 1 and Figure 2 | Distribution of TACO1 in mouse tissues and the effects of TACO1 loss on Complex IV biogenesis.**

(a) Distribution of the TACO1 protein in a range of tissues from wild type mice was determined by immunoblotting.

(b) Mitochondrial proteins (75  $\mu$ g) isolated from liver and heart *Taco1*<sup>mut/mut</sup> and *Taco1*<sup>wt/wt</sup> young and adult mice were resolved by BN-PAGE and stained with Coomassie Brilliant Blue.

(c) Mitochondria isolated from livers and hearts of young (50  $\mu$ g) *Taco1*<sup>mut/mut</sup> and *Taco1*<sup>wt/wt</sup> mice were analyzed by BN-PAGE and immunoblotting. Specific antibodies representing proteins of each of the mitochondrial complexes were used to compare abundance of protein in the *Taco1*<sup>wt/wt</sup> and *Taco1*<sup>mut/mut</sup> mice. The data are representative of results obtained from 8 mice from each strain and at least three independent biological experiments. \*,  $p < 0.05$  compared with control treatments by a 2-tailed paired Student's t test.

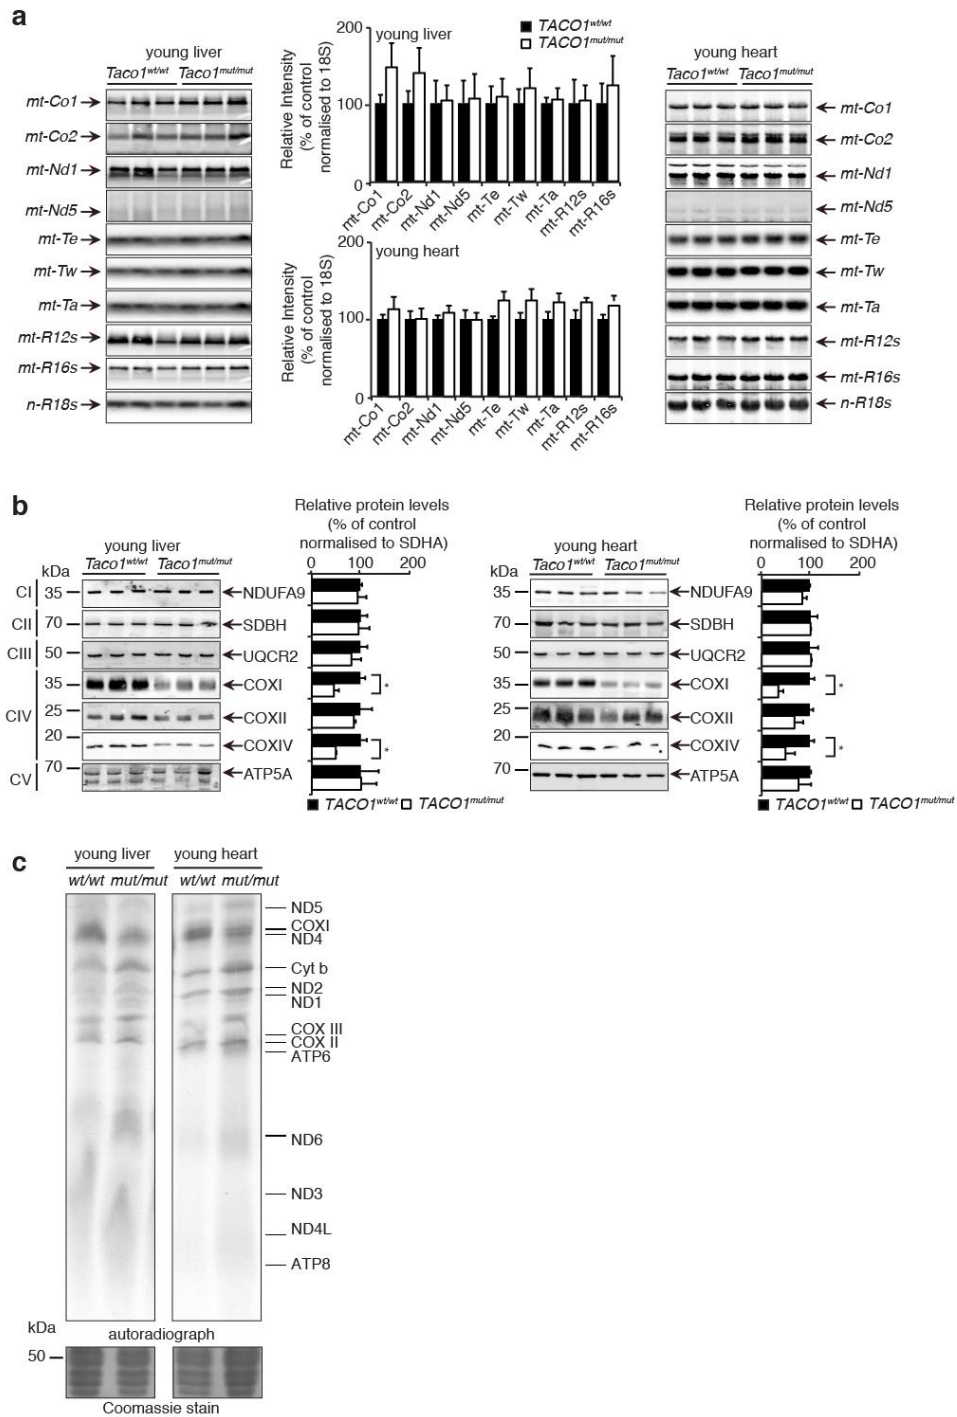

**Supplementary Figure 2. Related to Figure 2** | Loss of the TACO1 protein results in reduced steady state levels of Complex IV polypeptides, decreased COXI protein synthesis and decreased Complex IV activity in young *Taco1<sup>mut/mut</sup>* mice.

(a) The *Taco1* mutation does not affect mitochondrial RNA metabolism. The abundance of mature mitochondrial transcripts in mitochondria isolated from young *Taco1<sup>wt/wt</sup>* and *Taco1<sup>mut/mut</sup>* livers and hearts was analyzed by northern blotting. 18S rRNA was used as a loading control. The data are representative of results obtained from at least 8 mice from each strain and three independent biological experiments. \*,  $p < 0.05$  compared with control treatments by a 2-tailed paired Student's t test.

(b) Mitochondrial proteins (20 µg) from young *Taco1<sup>wt/wt</sup>* and *Taco1<sup>mut/mut</sup>* liver and heart were resolved on SDS-PAGE gels and immunoblotted against antibodies to investigate the steady state levels of nuclear and mitochondrial-encoded proteins. Porin was used as a loading control. Representative blots are shown of three independent biological experiments. \*,  $p < 0.05$  compared with control treatments by a 2-tailed paired Student's t test.

(c) Protein synthesis in heart of young *Taco1<sup>wt/wt</sup>* and *Taco1<sup>mut/mut</sup>* was measured by pulse incorporation of <sup>35</sup>S-labelled methionine and cysteine. Equal amounts of mitochondrial protein (50 µg) were separated by SDS-PAGE, stained using Coomassie Brilliant Blue to show equal loading and visualized by autoradiography. Representative gels are shown of three independent biological experiments.

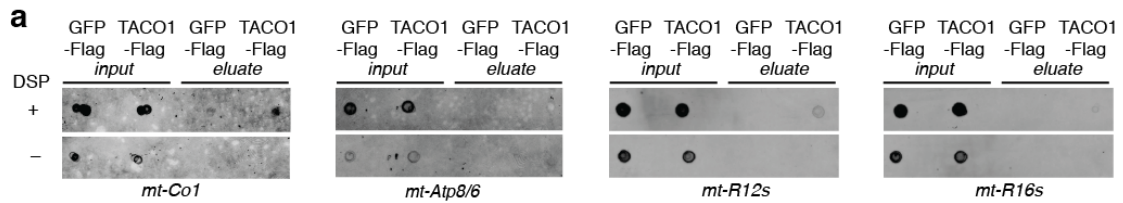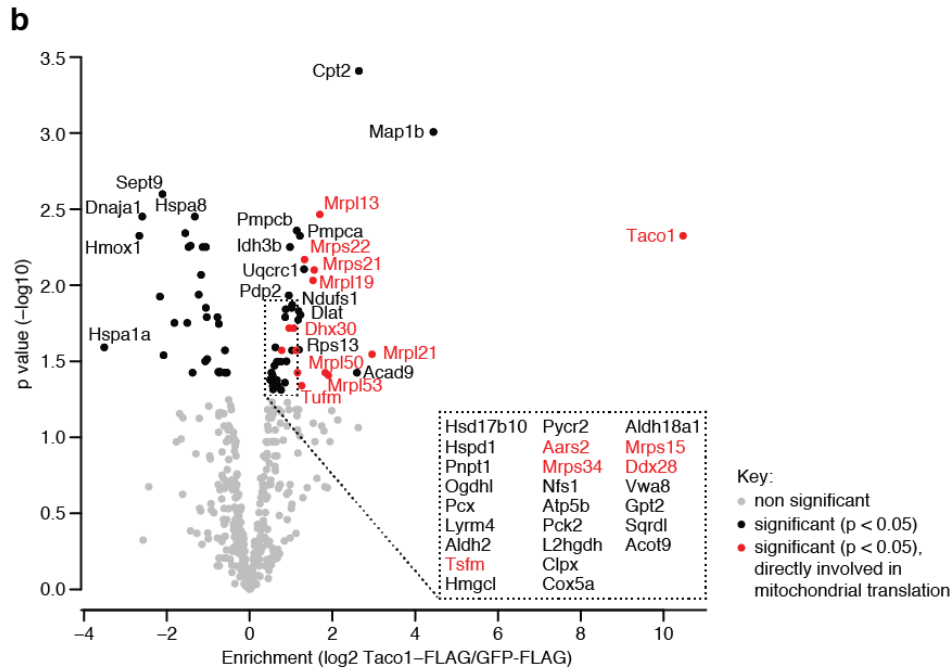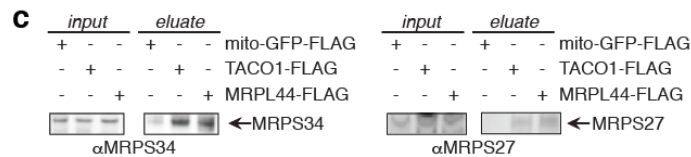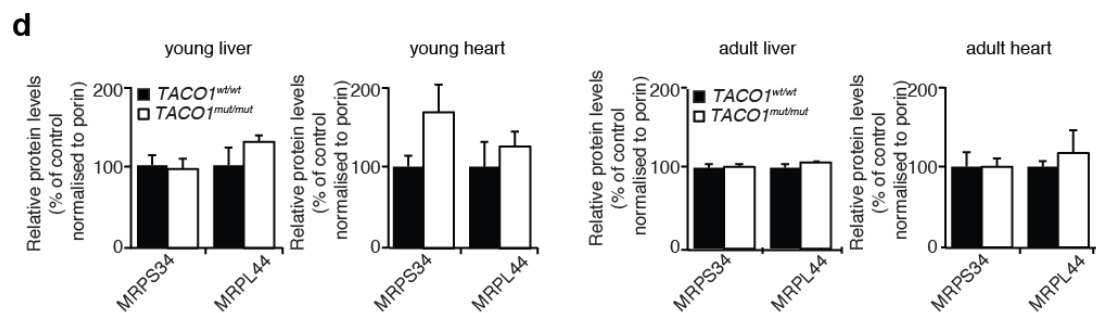

**Supplementary Figure 3. Related to Figure 4 | TACO1 transiently associates with *mt-Co1* mRNA.**  
**(a)** Dot blot of input and immunoprecipitated RNA from TACO1-FLAG or mito-EGFP-FLAG expressing NIH-3T3 cells. The blot was probed for *mt-Co1*, *mt-Atp8/6*, 12S rRNA and 16S rRNA.  
**(b)** Identification of proteins associated with TACO1 by mass spectrometry. TACO1-FLAG or control GFP-FLAG proteins were isolated from NIH-3T3 cells by crosslinking followed by immunoprecipitation and associated proteins were analysed by mass spectrometry-based label-free quantitative proteomics. Proteins where the adjusted p value was < 0.05 are shown in black. Proteins that were not significantly enriched, according to an adjusted p value of < 0.05, are shown in grey. Proteins that have been shown to be directly involved in mitochondrial translation, where the adjusted p value was < 0.05, are shown in red. Note that a number of proteins that very likely influence translation have not been highlighted (Hsd17b10 is a subunit of the mitochondrial RNase P complex,

required to produce tRNAs<sup>1,2</sup>; Dhx30 is found in mitochondrial RNA processing granules that are centres for mitochondrial ribosomal biogenesis<sup>3</sup>; Pnpt1 is part of the mitochondrial RNA degrading complex<sup>4</sup>; Idh3b has been identified as a mitochondrial RNA-binding protein<sup>5</sup>). Enrichment values are an average of three independent biological experiments.

(c) Immunoblots of mitochondrial ribosomal proteins immunoprecipitated TACO-FLAG, MRPL44-FLAG or mito-EGFP-FLAG expressing NIH-3T3 cells. The blots were probed for MRPS34 and MRPL27.

(d) Quantification of the mitochondrial ribosomal protein immunoblots shown in Fig. 4c.

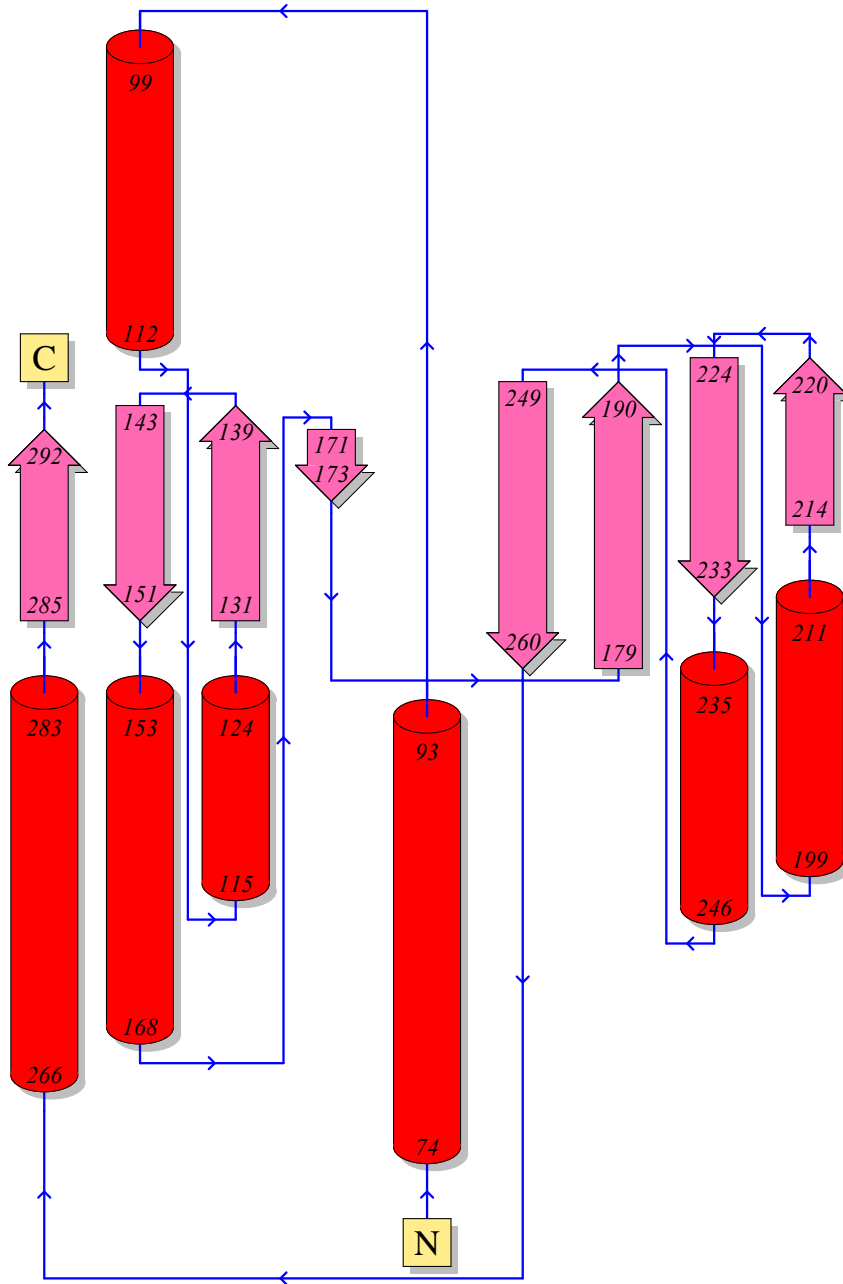

**Supplementary Figure 4. Related to Figure 5** | Topology diagram of TACO1.  $\alpha$ -helices are represented by red cylinders and  $\beta$ -strands by pink arrows. The beginning and end of each secondary structure element is indicated.

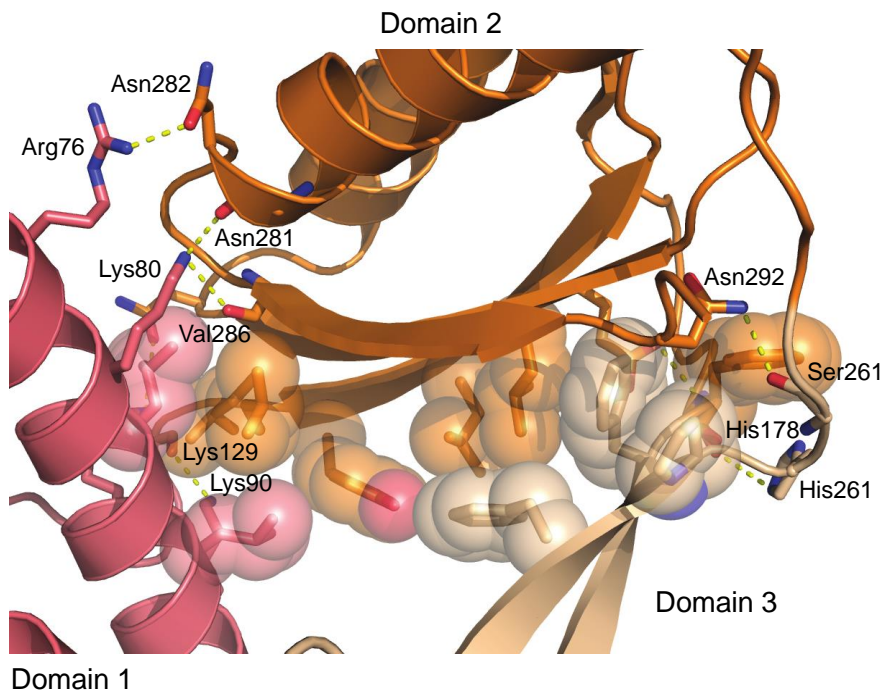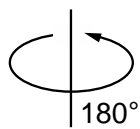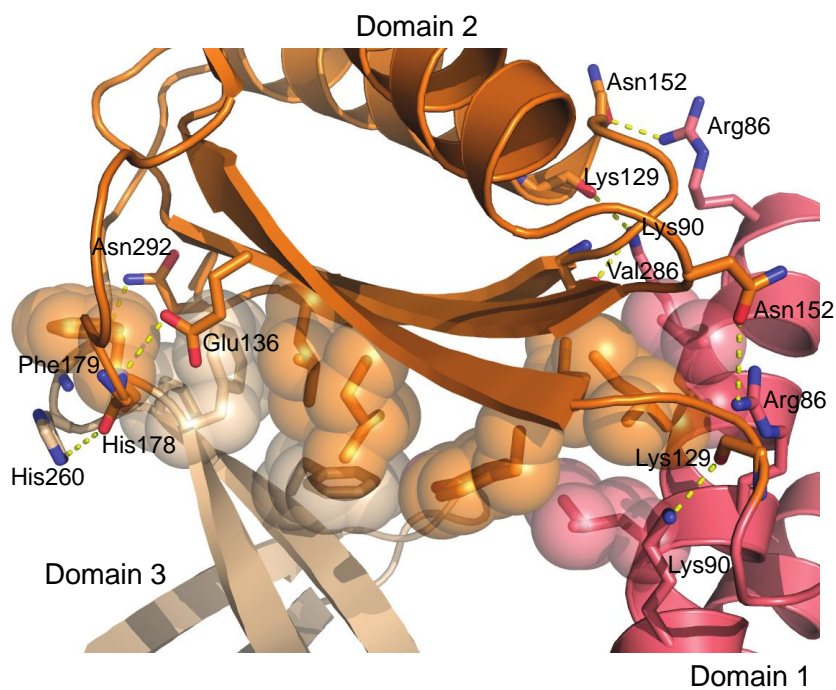

**Supplementary Figure 5. Related to Figure 5** | Interface between domains. Interacting polar residues are shown as sticks and hydrophobic residues as spheres.



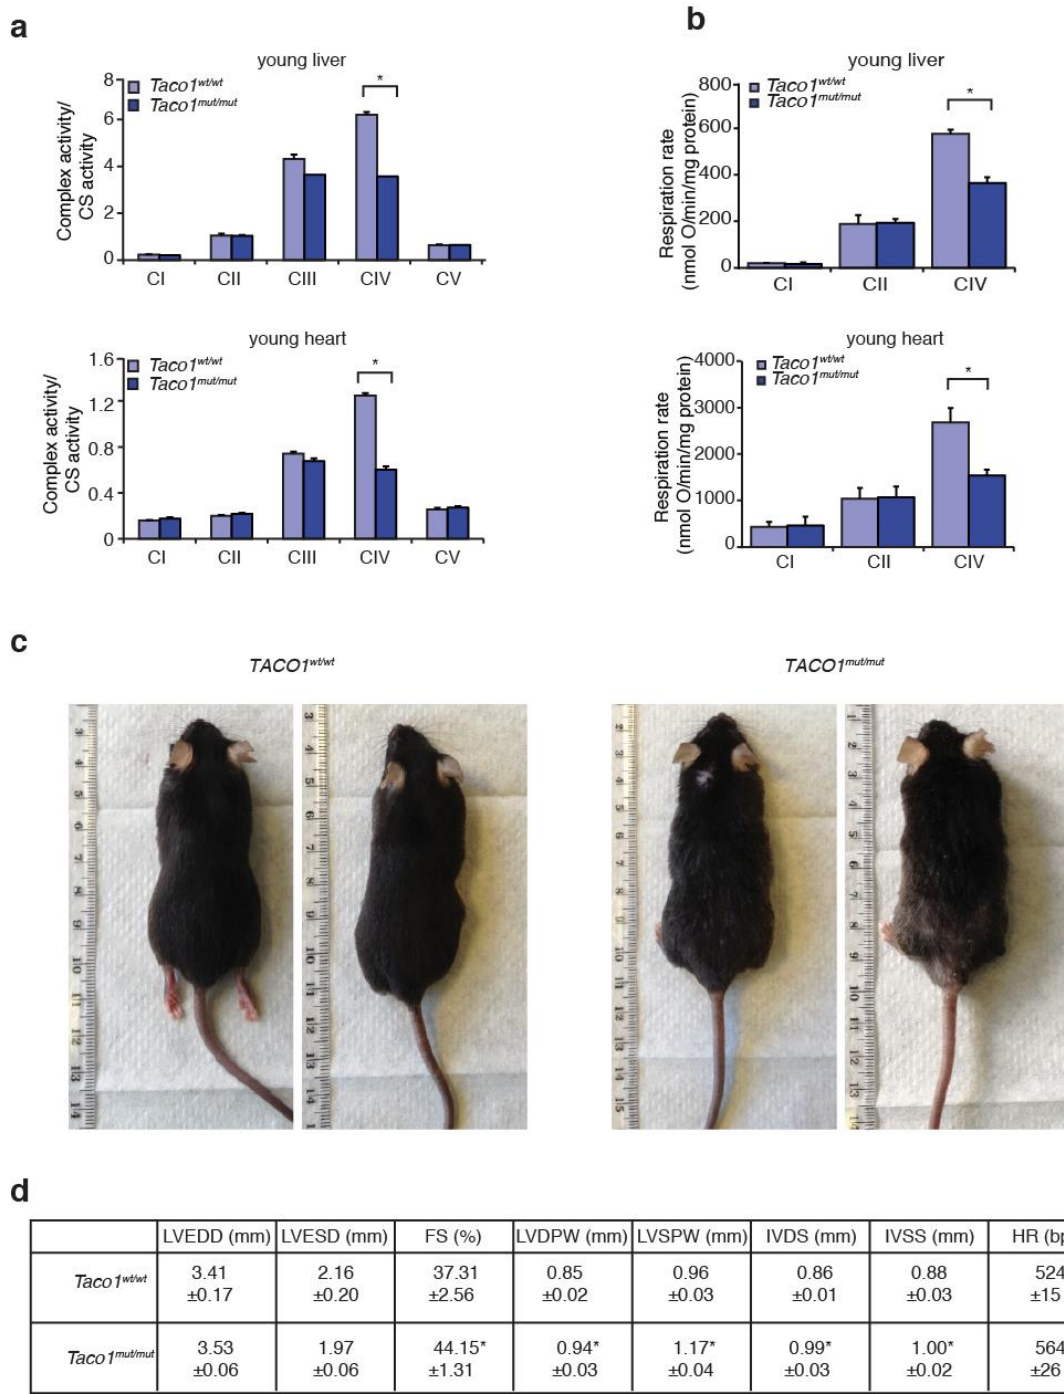

**Supplementary Figure 6. Related to Figure 7 | Adult *Taco1*<sup>mut/mut</sup> mice have isolated cytochrome c deficiency and show signs of ageing and cardiomyopathy by echocardiography.**

(a) Respiratory complex activities were measured spectrophotometrically and normalized to citrate synthase activity in mitochondria isolated from livers and hearts of young *Taco1*<sup>wt/wt</sup> (n=8) and *Taco1*<sup>mut/mut</sup> mice (n=8). Data are means ± SEM of three-four separate experiments; \*, *p* < 0.05 compared with control treatments by a 2-tailed paired Student's *t* test.

(b) Loss of the TACO1 protein causes reduced respiration at Complex IV in *Taco1*<sup>mut/mut</sup> mice. State 3 respiration was measured in mitochondria isolated from hearts and livers of *Taco1*<sup>wt/wt</sup> and *Taco1*<sup>mut/mut</sup> mice using an OROBOROS oxygen electrode. Data are means ± SEM of three-four separate experiments; \*, *p* < 0.05 compared with control treatments by a 2-tailed paired Student's *t* test.

(c) Representative images of *Taco1*<sup>wt/wt</sup> and *Taco1*<sup>mut/mut</sup> mice. The *Taco1*<sup>mut/mut</sup> mice have a ruffled and aged appearance.

(d) Echocardiographic parameters of *Taco1*<sup>wt/wt</sup> (n=5) and *Taco1*<sup>mut/mut</sup> (n=5) mice. LVEDD, left ventricular end diastolic diameter; LVESD, left ventricular end systolic diameter; FS, fractional



shortening; LVDPW, left ventricular posterior wall in diastole; LVSPW, left ventricular posterior wall in systole; IVDS, intraventricular septum in diastole; IVSS, intraventricular septum in systole. Values are means  $\pm$  standard error. \* $p < 0.05$  compared with *Taco1*<sup>wt/wt</sup>.

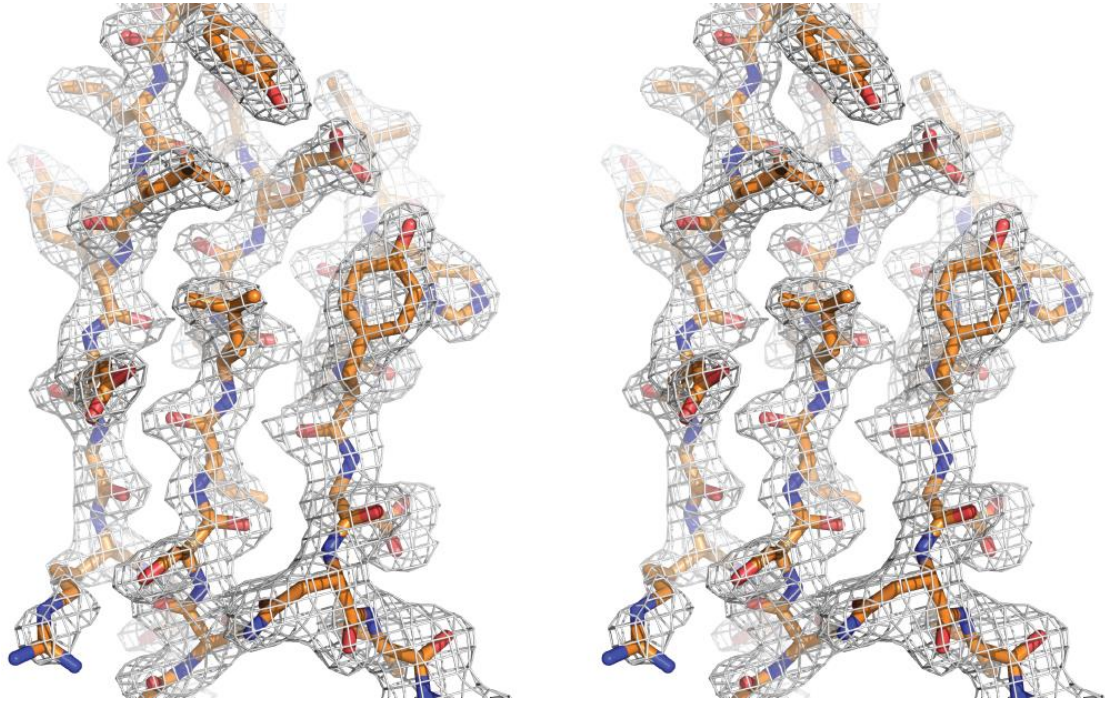

**Supplementary Figure 7** | Stereo image of electron density for TACO1. Stereo image showing the final weighted  $2F_o - F_c$  electron density map of a representative section of TACO1 contoured at  $1.5 \sigma$ .

**Supplementary Figure 8** | Supplementary blots.

Scans of blots related to Figure 1 and Figure 2

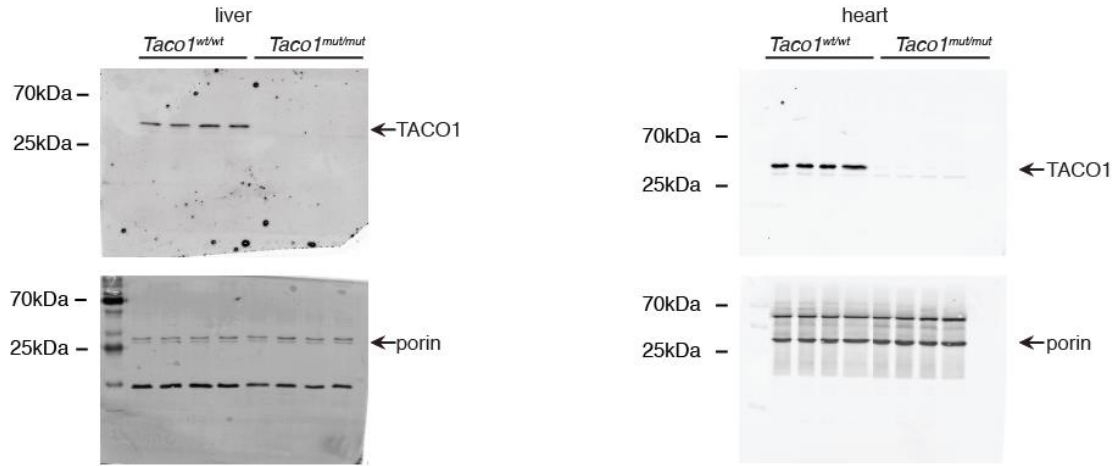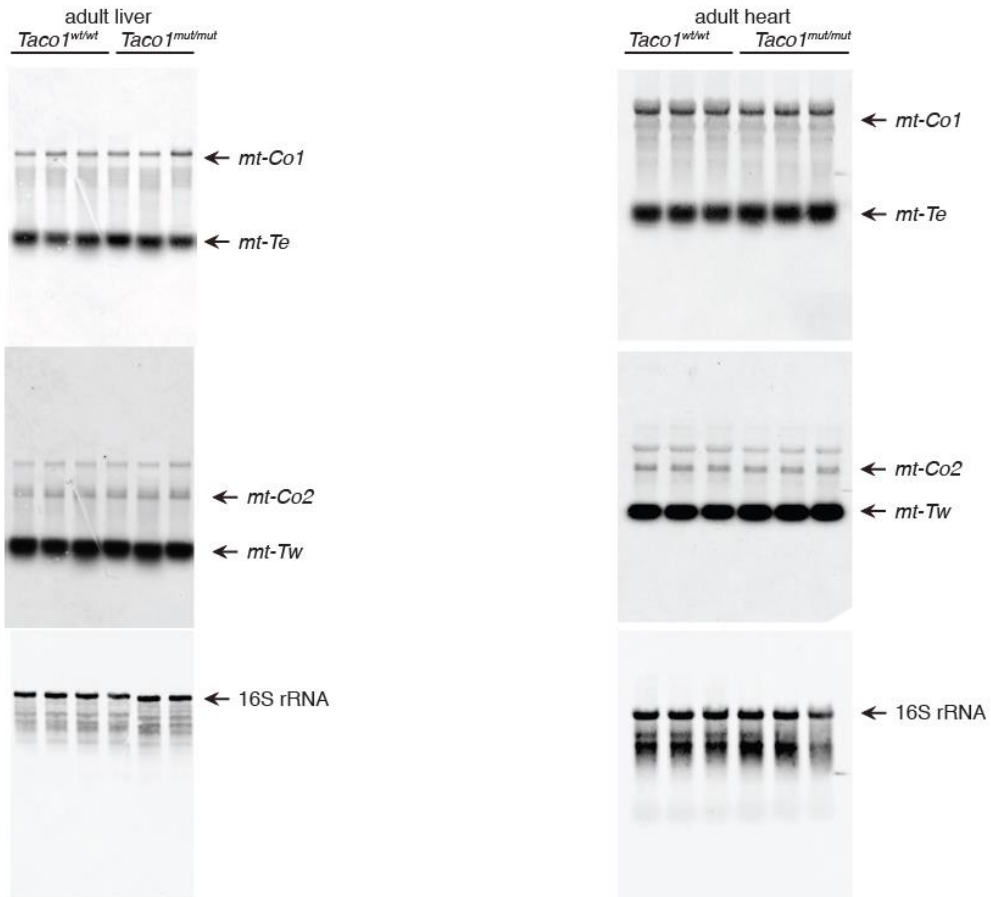

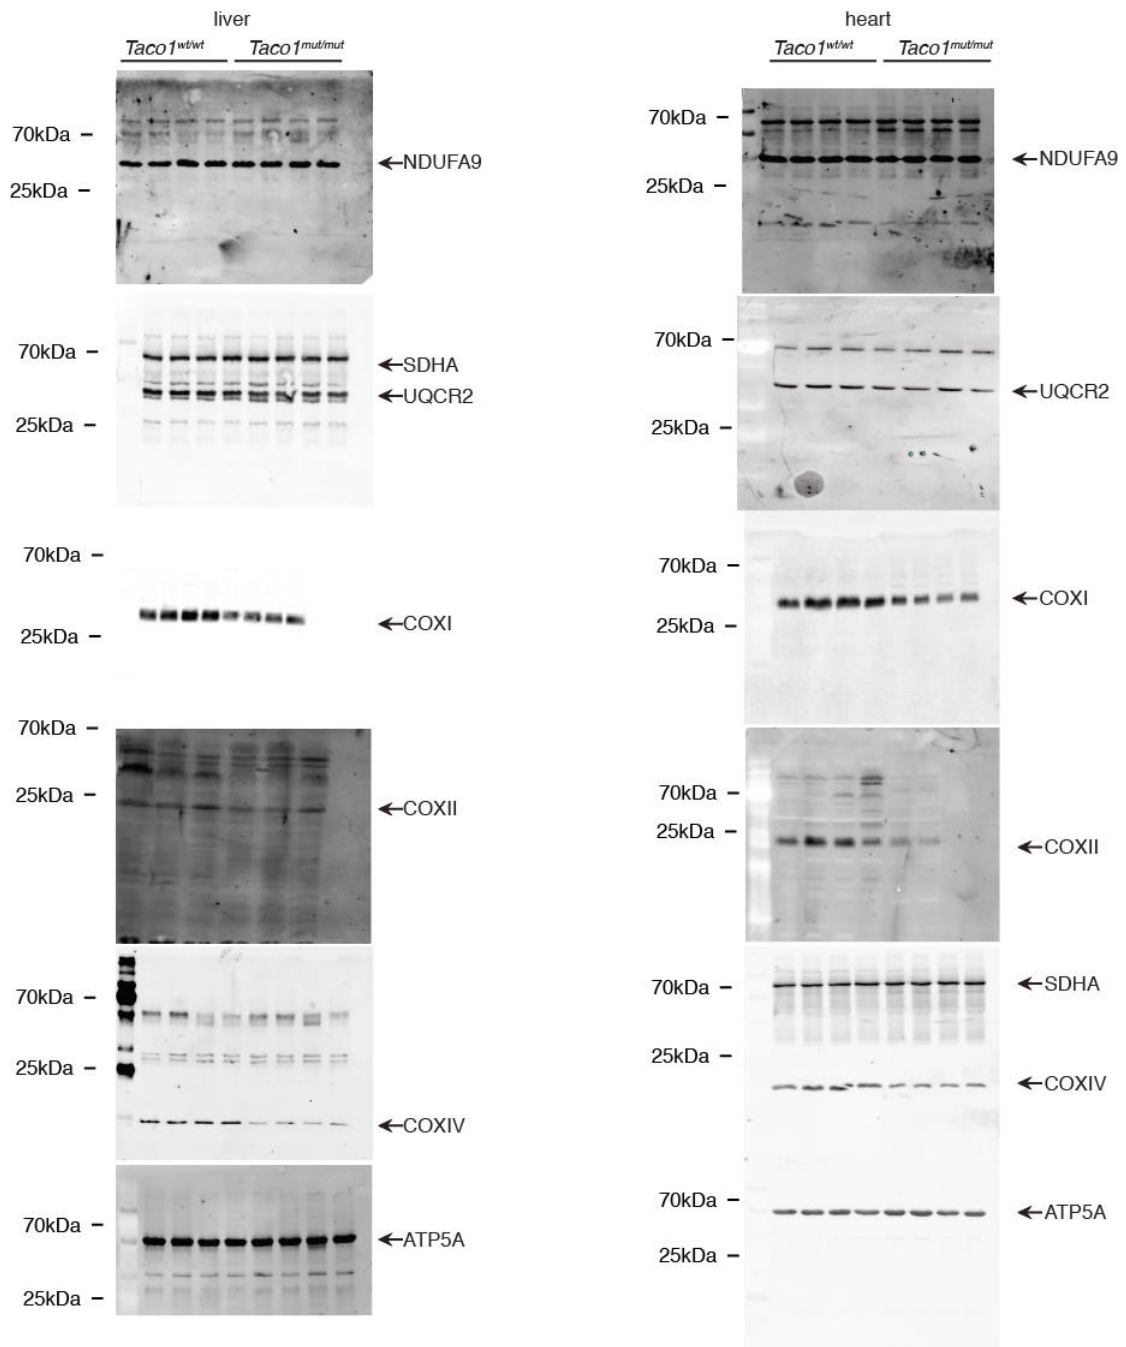

Scans of blots related to Figure 4

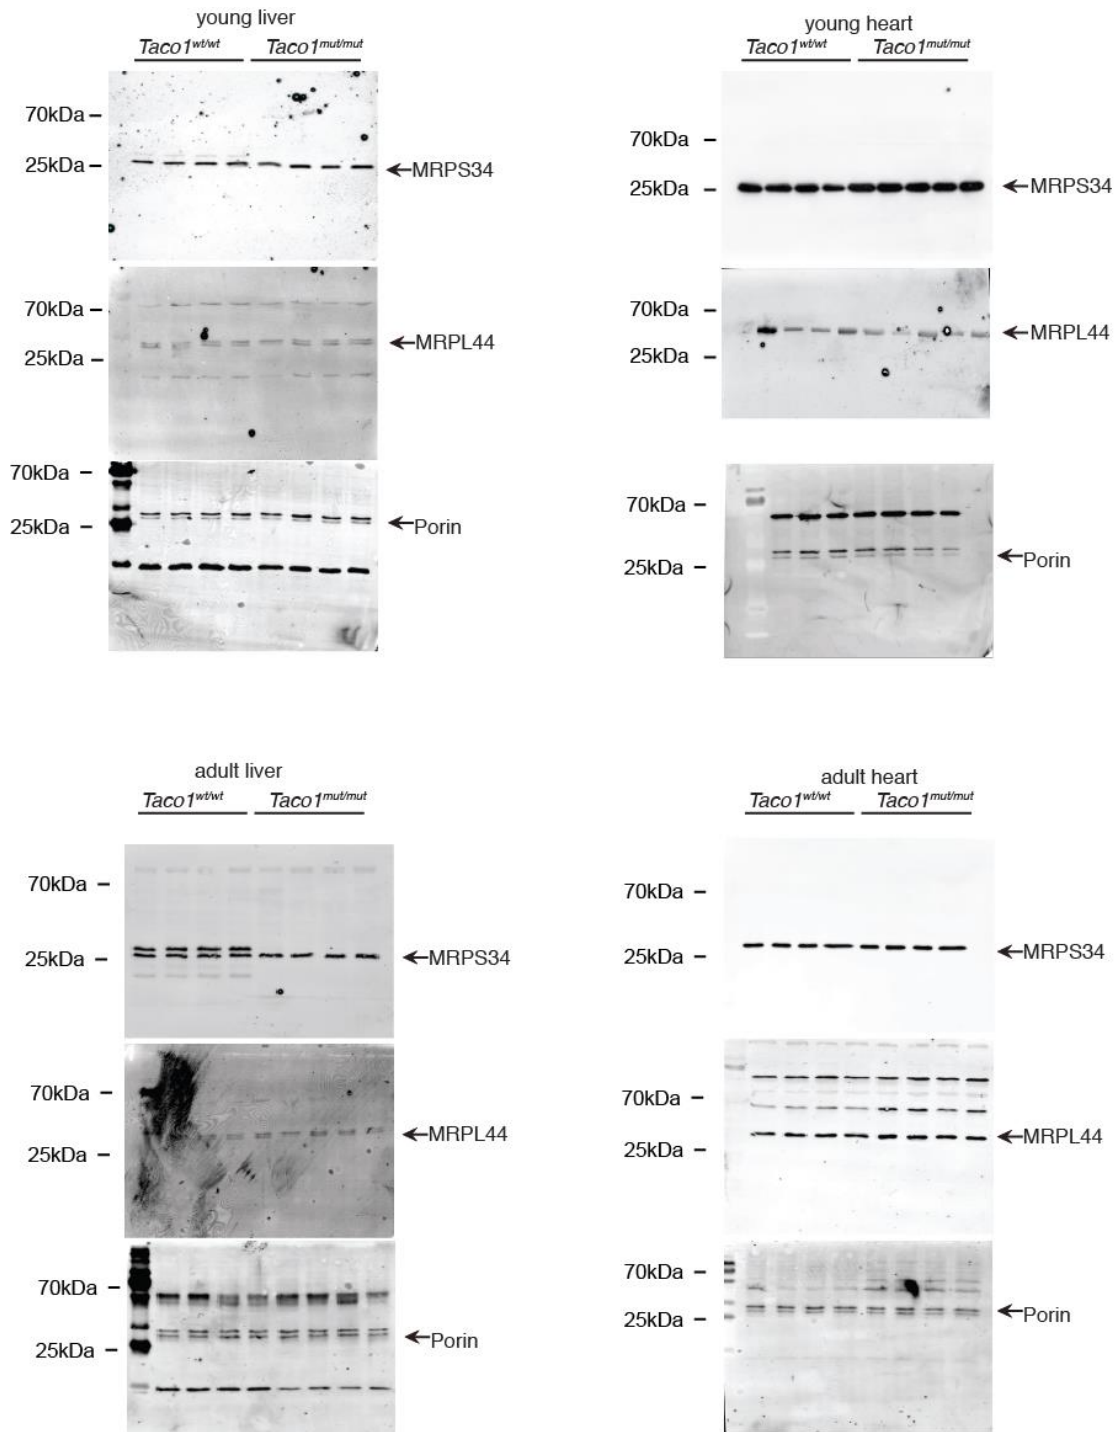

**Supplementary Table 1. Data collection and refinement statistics**

|                                                         | Native                                        | Se-Met                                        |
|---------------------------------------------------------|-----------------------------------------------|-----------------------------------------------|
| <b>Data collection</b>                                  |                                               |                                               |
| Space group                                             | P2 <sub>1</sub> 2 <sub>1</sub> 2 <sub>1</sub> | P2 <sub>1</sub> 2 <sub>1</sub> 2 <sub>1</sub> |
| Cell dimensions                                         |                                               |                                               |
| <i>a</i> , <i>b</i> , <i>c</i> (Å)                      | 48.5, 55.3, 92.0                              | 48.6, 54.7, 91.5                              |
| $\alpha$ , $\beta$ , $\gamma$ (°)                       | 90, 90, 90                                    | 90, 90, 90                                    |
| Resolution (Å)                                          | 100–2.0 (2.07-2.0)*                           | 47.0–2.15 (2.23–<br>2.15)                     |
| <i>R</i> <sub>sym</sub> (%)                             | 5.6 (110.6)                                   | 9.7 (157.9)                                   |
| <i>I</i> / $\sigma$ ( <i>I</i> )                        | 17.41 (1.73)                                  | 15.1 (1.6)                                    |
| Completeness (%)                                        | 99.9 (99.8)                                   | 100.0 (100.0)                                 |
| Redundancy                                              | 6.3 (6.4)                                     | 12.8 (12.7)                                   |
| <b>Refinement</b>                                       |                                               |                                               |
| Resolution (Å)                                          | 19.5–2.0 (2.09-2.00)                          |                                               |
| No. reflections                                         | 17324                                         |                                               |
| <i>R</i> <sub>work</sub> / <i>R</i> <sub>free</sub> (%) | 20.2/22.1                                     |                                               |
| No. atoms                                               |                                               |                                               |
| Protein                                                 | 1713                                          |                                               |
| Water                                                   | 56                                            |                                               |
| <i>B</i> -factors                                       |                                               |                                               |
| Protein                                                 | 57.6                                          |                                               |
| Water                                                   | 48.9                                          |                                               |
| R.m.s. deviations                                       |                                               |                                               |
| Bond lengths (Å)                                        | 0.013                                         |                                               |
| Bond angles (°)                                         | 1.062                                         |                                               |

Two crystals were used for the structure.

\*Values in parentheses are for highest-resolution shell.

**Supplementary Table 2. Structure Database Search**

| PDB-chain | Z    | rmsd | lali | nres | % id | Description                                       |
|-----------|------|------|------|------|------|---------------------------------------------------|
| 4f3q-A    | 21.5 | 3.1  | 211  | 234  | 24   | YEBC family protein Cbu_1566                      |
| 1lfp-A    | 20.0 | 5.1  | 211  | 243  | 32   | Hypothetical protein Aq_1575                      |
| 1mw7-A    | 18.6 | 4.8  | 210  | 220  | 26   | Hypothetical protein HP0162                       |
| 1kon-A    | 17.9 | 4.7  | 198  | 233  | 29   | Protein YEBC                                      |
| 3hul-A    | 6.9  | 6.5  | 102  | 277  | 11   | Homoserine kinase                                 |
| 4czd-B    | 6.9  | 10.0 | 84   | 159  | 8    | Putative transcriptional regulator, ASNC family   |
| 4pwu-B    | 6.9  | 2.8  | 67   | 77   | 3    | Modulator protein MZRA                            |
| 3wz0-A    | 6.9  | 2.4  | 68   | 104  | 12   | Ribonuclease P protein component 3                |
| 3bic-B    | 6.9  | 16.8 | 70   | 715  | 9    | Methylmalonyl-COA mutase, mitochondrial precursor |
| 3ofe-B    | 6.9  | 6.8  | 68   | 78   | 9    | LDLR Chaperone Boca                               |
| 4un1-D    | 6.8  | 12.7 | 99   | 157  | 8    | Putative transcriptional regulator, ASNC family   |

Results obtained using DaliLite v.3<sup>7</sup>.



## **Supplemental Methods:**

### **Mass spectrometry based proteomic analysis of affinity purified protein complexes**

Purified proteins were subjected to TCA precipitation and resuspended in 10 µl lysis buffer (6 M guanidinium chloride, 10 mM Tris(2-carboxyethyl)phosphine hydrochloride, 40 mM chloroacetamide and 100 mM Tris-HCl). Samples were diluted ten times with 20 mM Tris pH 8.3 and digested overnight at 37°C with 300 ng of Trypsin Gold (Promega). Peptides were desalted using home-made StageTips (Empore Octadecyl C18, 3M; <sup>8</sup>) and eluted with 80 µl of 60% acetonitrile/0.1% formic acid buffer. Samples were dried with a vacuum concentrator plus (Eppendorf) and resuspended in 4 µl of 0.1% formic acid for mass spectrometry using an EASY nano-LC 1000 (Thermo Scientific) coupled via a nano-electrospray ionization source to an Orbitrap Fusion mass spectrometer (Thermo Fisher Scientific). Protein and peptide identification was performed using Peaks <sup>9</sup> version 7.5. Raw data was searched against the mouse reference proteome from UniProt. Label free quantification was performed using Skyline <sup>10</sup> employing the MS1 filtering approach <sup>11</sup>. Statistical analyses were performed in R (R Development Core Team, 2011, available online at <http://www.R-project.org/>). Only proteins with adjusted p values of less than 0.05 (1% FDR) were termed significant.

### Supplemental References:

1. Zschocke, J. HSD10 disease: clinical consequences of mutations in the HSD17B10 gene. *J Inherit Metab Dis* **35**, 81–89 (2012).
2. Lopez Sanchez, M. I. *et al.* RNA processing in human mitochondria. *Cell Cycle* **10**, 2904–2916 (2011).
3. Antonicka, H. & Shoubridge, E. A. Mitochondrial RNA Granules Are Centers for Posttranscriptional RNA Processing and Ribosome Biogenesis. *Cell Rep* **10**, 920–932 (2015).
4. Borowski, L. S. L., Dziembowski, A. A., Hejnowicz, M. S. M., Stepień, P. P. P. & Szczesny, R. J. R. Human mitochondrial RNA decay mediated by PNPase-hSuv3 complex takes place in distinct foci. *Nucleic Acids Res* **41**, 1223–1240 (2012).
5. Castello, A. *et al.* Insights into RNA biology from an atlas of mammalian mRNA-binding proteins. *Cell* **149**, 1393–1406 (2012).
6. Lovell, S. C. *et al.* Structure validation by C alpha geometry: phi,psi and C beta deviation. *Proteins* **50**, 437–450 (2003).
7. Holm, L., Kääriäinen, S., Rosenström, P. & Schenkel, A. Searching protein structure databases with DaliLite v.3. *Bioinformatics* **24**, 2780–2781 (2008).
8. Rappsilber, J., Mann, M. & Ishihama, Y. Protocol for micro-purification, enrichment, pre-fractionation and storage of peptides for proteomics using StageTips. *Nat Protoc* **2**, 1896–1906 (2006).
9. Bin Ma *et al.* PEAKS: powerful software for peptide de novo sequencing by tandem mass spectrometry. *Rapid Commun Mass Spectrom* **17**, 2337–2342 (2002).
10. MacLean, B. *et al.* Skyline: an open source document editor for creating and analyzing targeted proteomics experiments. *Nat Commun* **26**, 966–968 (2010).
11. Schilling, B. *et al.* Platform-independent and label-free quantitation of proteomic data using MS1 extracted ion chromatograms in skyline: application to protein acetylation and phosphorylation. *Mol Cell Proteomics* **11**, 202–214 (2012).
